# Supplementary material
Source: bioRxiv or medRxiv preprint supplement (https://medrxiv.org/highwire/filestream/77525/field_highwire_adjunct_files/0/2020.04.19.20071563-1.pdf)
Supplement: Supplementary file [file 2020.04.19.20071563-1.pdf]

| Patient          | Symptoms                                                                                                                            | Swabs    | Kit Wantai SARS-Cov-2 Ab (Ig Total) | Kit Acro Biotech (USA) (IgG-IgM) | Kit KHB Korea (IgG-IgM) |
|------------------|-------------------------------------------------------------------------------------------------------------------------------------|----------|-------------------------------------|----------------------------------|-------------------------|
| Positive control | -                                                                                                                                   | Positive | 100%                                | 100%-0                           | 100%-0                  |
| Negative control | -                                                                                                                                   | Negative | 0                                   | 0                                | 0                       |
| 1                | Fever, cough, cold, nasal stuffiness, conjunctivitis, tiredness, muscular pain, diarrhea, inappetence, anosmia, dysgeusia, headache | Positive | 79%                                 | 0-0                              | 0-0                     |
| 2                | Cough, cold, nasal stuffiness, headache, tiredness, nausea, diarrhea                                                                | Negative | 52%                                 | 0-0                              | 0-0                     |
| 3                | Cold, nasal stuffiness, anosmia, dysgeusia                                                                                          | Negative | 100%                                | 100%-0                           | 100%-0                  |
| 4                | Tiredness, headache                                                                                                                 | Negative | 0                                   | 0-0                              | 0-0                     |
| 5                | None                                                                                                                                | Negative | 5%                                  | 0-0                              | 0-0                     |
| 6                | None                                                                                                                                | Negative | 1%                                  | 0-0                              | 0-0                     |
| 7                | None                                                                                                                                | Negative | 0                                   | 0-0                              | 0-0                     |

**Supplementary Table 1:** Patient: patients' number plus both the positive and negative controls. Symptoms: symptom of each patient; Swabs: positivity or negativity of the swab tests; the other three columns refer to the kits used. The intensity of the test line compared to the control one is reported as percentage.
